# Supplementary material
Source: HighWire-hosted journal article supplement (https://www.rcpjournals.org/highwire/filestream/13807/field_highwire_adjunct_files/1/Vardy_Supplementary_material_S2.pdf)
Supplement: Vardy_Supplementary_material_S2.pdf [file Vardy_Supplementary_material_S2.pdf]

**Supplementary material S2: Community delirium toolkit project timeline**

|                                  |                                                                                                                                                                                                                                                                                                                                                                                                        |
|----------------------------------|--------------------------------------------------------------------------------------------------------------------------------------------------------------------------------------------------------------------------------------------------------------------------------------------------------------------------------------------------------------------------------------------------------|
| <b>March 2018</b>                | Hosted free <b>1<sup>st</sup> Greater Manchester World Delirium Awareness Day event</b>                                                                                                                                                                                                                                                                                                                |
| <b>Winter – Summer 2018</b>      | <p><b>Establish delirium steering group</b></p> <ul style="list-style-type: none"> <li>• Develop evidence-based Greater Manchester approach to delirium and pathway</li> </ul>                                                                                                                                                                                                                         |
| <b>Spring – Autumn 2019</b>      | <p><b>Working groups established for different settings</b></p> <ul style="list-style-type: none"> <li>• Involving carers, people living with dementia, doctors, nurses, mental health and social care professionals, Ambulance Service, primary care, and allied health professionals.</li> <li>• Hosted free <b>2<sup>nd</sup> World Delirium Awareness Day event</b>, March 2019</li> </ul>         |
| <b>Winter 2019 – Spring 2020</b> | <p><b>toolkit and leaflet development</b></p> <ul style="list-style-type: none"> <li>• Content reviewed and redrafted with 80 delegates at World Delirium Awareness Day event, March 2020.</li> <li>• Input and sign off from Dementia United governance of working version.</li> <li>• Shared with primary care cell, Dementia United stakeholders, and all delirium engaged stakeholders.</li> </ul> |
| <b>Summer – Winter 2020</b>      | <p><b>Testing</b></p> <ul style="list-style-type: none"> <li>• Expressions of interest and launch meetings with piloting teams.</li> <li>• Fortnightly support for piloting teams.</li> <li>• Six-month Plan Do Study Act cycle of quality improvement, analysis, and feedback during the pilot.</li> </ul>                                                                                            |
| <b>Spring 2021</b>               | <p><b>End of pilot</b></p> <ul style="list-style-type: none"> <li>• Analysis and report on findings, recommendations for rollout.</li> </ul>                                                                                                                                                                                                                                                           |
